# Supplementary material for: Obstacles to prompt and effective malaria treatment lead to low community-coverage in two rural districts of Tanzania
Source: PubMed Central journal article supplement (PMC2564938; doi:10.1186/1471-2458-8-317), 2008-09-16
Supplement: 1471-2458-8-317-S2.pdf [file 1471-2458-8-317-S2.pdf]

Hetzel *et al.* Obstacles to prompt and effective malaria treatment lead to low community-coverage in two rural districts of Tanzania.

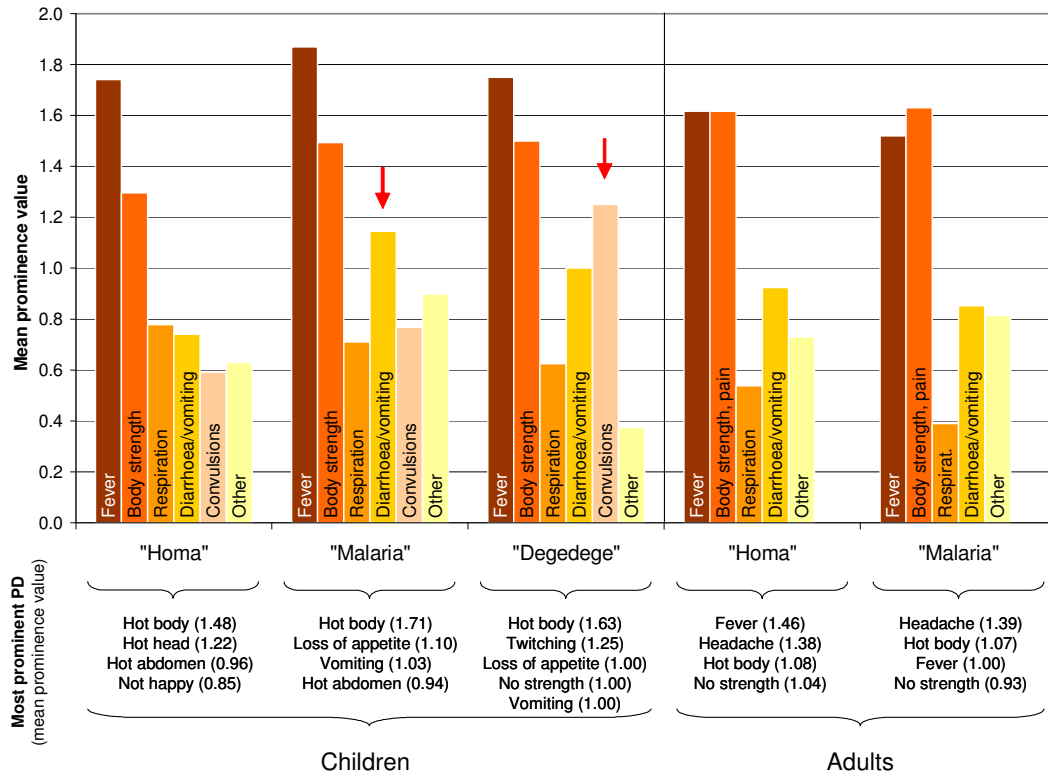

**Figure A1: Pattern of distress (PD) by illness category. Grouped (bars) and most prominent signs and symptoms.**

Hetzel *et al.* Obstacles to prompt and effective malaria treatment lead to low community-coverage in two rural districts of Tanzania.

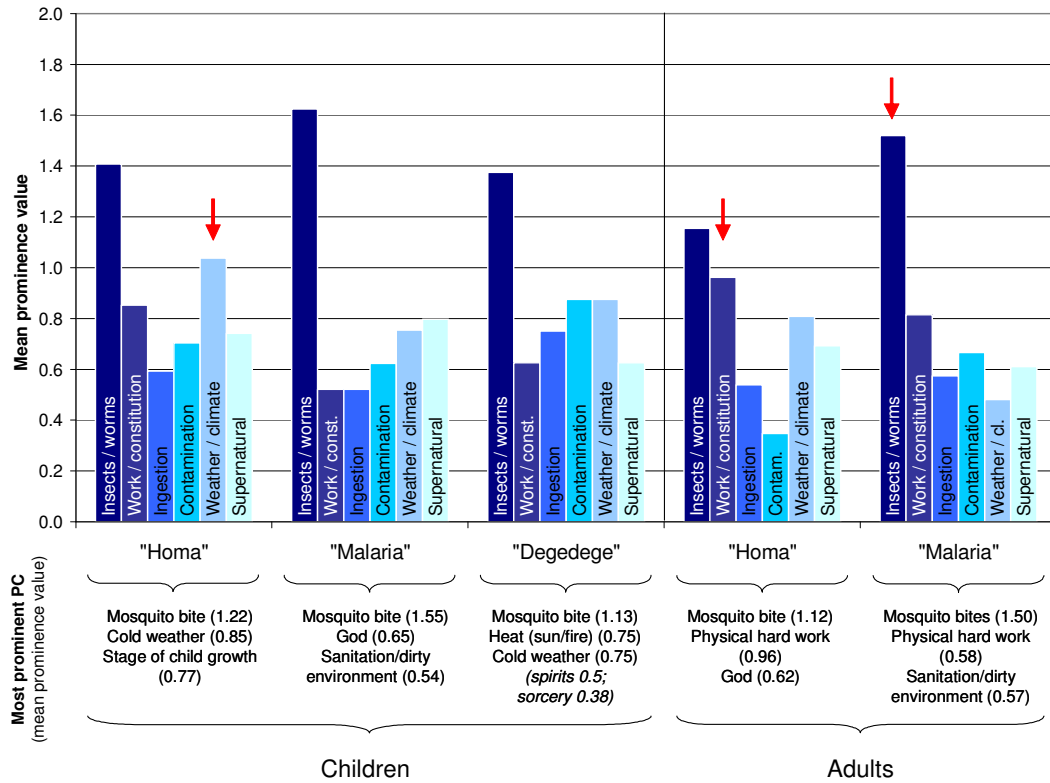

Figure A2: Perceived causes (PC) by illness category. Grouped (bars) and most prominent PC.
